# Supplementary material
Source: HighWire-hosted journal article supplement (https://jnm.snmjournals.org/highwire/filestream/95121/field_highwire_adjunct_files/0/185199_Supplemental_Data.pdf)
Supplement: 185199_Supplemental_Data.pdf [file 185199_Supplemental_Data.pdf]

Supplemental Table 1. Human PK predictions for JNJ311.

|                                                                                                                                                                                                                     | Mouse <sup>†</sup> | Rat <sup>†</sup> | Dog <sup>†</sup> | Human                                  |
|---------------------------------------------------------------------------------------------------------------------------------------------------------------------------------------------------------------------|--------------------|------------------|------------------|----------------------------------------|
| Unbound plasma fraction (%)                                                                                                                                                                                         | 36.8               | 36.9             | 36.9             | 37.1                                   |
| Dose JNJ311 (mg/kg)*                                                                                                                                                                                                | 0.25               | 0.25             | 0.25             | 0.25 (pred.)                           |
| Plasma clearance (mL/min/kg)                                                                                                                                                                                        | 193 ± 63           | 116 ± 10         | 77 ± 16          | 1.05 <sup>‡</sup> , 1.285 <sup>§</sup> |
| Liver blood flow (%)                                                                                                                                                                                                | > 100              | > 100            | > 100            | -                                      |
| Volume of distribution at steady state (L/kg)                                                                                                                                                                       | 4.0 ± 0.7          | 4.5 ± 0.9        | 4.0 ± 1.0        | 2.98 <sup>‡</sup> , 3.96 <sup>§</sup>  |
| Elimination half-life (h)                                                                                                                                                                                           | 0.3 ± 0.1          | 0.4 ± 0.1        | 0.7 ± 0.1        | 0.7 <sup>‡</sup> , 2.4 <sup>§</sup>    |
| *Formulations with 20% HPβCD aq, <sup>†</sup> values represent mean ± standard deviation from 3 animals, <sup>‡</sup> predicted value using Dedrick approach, <sup>§</sup> predicted value using allometric scaling |                    |                  |                  |                                        |

Supplemental Table 2. Biodistribution of  $^{18}\text{F}$ -JNJ311 and  $^{18}\text{F}$ -AV1451 in NMRI mice at 2, 10, 30 and 60 min p.i.\*

| Body part  | $^{18}\text{F}$ -JNJ311 |           |           |           | $^{18}\text{F}$ -AV1451 |           |           |           |
|------------|-------------------------|-----------|-----------|-----------|-------------------------|-----------|-----------|-----------|
|            | 2 min                   | 10 min    | 30 min    | 60 min    | 2 min                   | 10 min    | 30 min    | 60 min    |
| Blood      | 0.5 ± 0.1               | 0.3 ± 0.1 | 0.2 ± 0.0 | 0.1 ± 0.0 | 0.4 ± 0.1               | 0.3 ± 0.0 | 0.2 ± 0.0 | 0.2 ± 0.0 |
| Bone       | 0.5 ± 0.2               | 0.7 ± 0.1 | 0.6 ± 0.1 | 0.5 ± 0.1 | 0.6 ± 0.4               | 0.5 ± 0.1 | 0.7 ± 0.1 | 0.9 ± 0.2 |
| Brain      | 1.9 ± 0.1               | 0.8 ± 0.2 | 0.3 ± 0.0 | 0.1 ± 0.0 | 2.2 ± 0.3               | 1.0 ± 0.2 | 0.2 ± 0.1 | 0.1 ± 0.0 |
| Cerebellum | 1.9 ± 0.2               | 0.7 ± 0.1 | 0.2 ± 0.1 | 0.1 ± 0.0 | 2.4 ± 0.5               | 0.9 ± 0.2 | 0.2 ± 0.1 | 0.1 ± 0.0 |
| Cerebrum   | 1.9 ± 0.1               | 0.8 ± 0.1 | 0.3 ± 0.1 | 0.1 ± 0.0 | 2.1 ± 0.3               | 1.0 ± 0.2 | 0.3 ± 0.1 | 0.1 ± 0.0 |
| Heart      | 2.3 ± 0.8               | 1.1 ± 0.6 | 0.4 ± 0.1 | 0.1 ± 0.1 | 2.0 ± 0.4               | 0.8 ± 0.1 | 0.4 ± 0.1 | 0.3 ± 0.0 |
| Kidneys    | 10.6 ± 2.9              | 8.1 ± 2.5 | 2.9 ± 0.6 | 0.9 ± 0.1 | 10.4 ± 2.4              | 9.7 ± 1.0 | 4.9 ± 1.5 | 3.8 ± 0.7 |
| Liver      | 2.6 ± 0.6               | 4.6 ± 0.7 | 3.4 ± 0.4 | 1.6 ± 0.3 | 3.6 ± 0.6               | 5.6 ± 0.5 | 6.5 ± 0.6 | 5.3 ± 0.6 |
| Lungs      | 8.3 ± 4.6               | 2.6 ± 1.3 | 1.0 ± 0.3 | 0.2 ± 0.1 | 7.0 ± 2.5               | 1.6 ± 0.6 | 1.2 ± 0.3 | 0.6 ± 0.2 |
| Muscle     | 1.4 ± 0.1               | 0.6 ± 0.0 | 0.2 ± 0.1 | 0.1 ± 0.0 | 0.9 ± 0.5               | 0.5 ± 0.1 | 0.2 ± 0.0 | 0.1 ± 0.0 |
| Pancreas   | 1.4 ± 0.4               | 1.8 ± 0.4 | 0.8 ± 0.1 | 0.2 ± 0.0 | 1.2 ± 0.6               | 1.8 ± 0.3 | 0.7 ± 0.3 | 0.4 ± 0.1 |
| Spleen     | 4.9 ± 0.7               | 2.3 ± 1.0 | 0.8 ± 0.2 | 0.2 ± 0.0 | 4.5 ± 1.6               | 5.2 ± 4.8 | 1.2 ± 0.4 | 0.9 ± 0.4 |
|            | 2/60 min                |           |           |           | 2/60 min                |           |           |           |
| Brain      | 29.6                    |           |           |           | 18.3                    |           |           |           |
| Blood      | 7.5                     |           |           |           | 2.4                     |           |           |           |

\*Data are expressed as SUV mean ± standard deviation;  $n = 3$  per time point; ratios were calculated using non rounded values

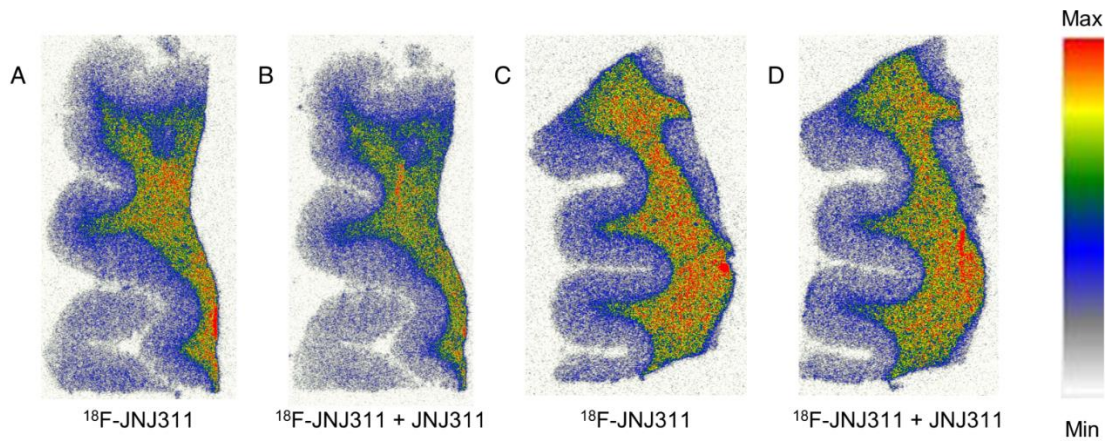

Supplemental Figure 1. Adjacent, 10- $\mu\text{m}$ -thick, post-mortem human PSP (A and B) and CBD (C and D) brain slices of the frontal cortex of a PSP patient (71-year-old) and CBD patient (74-year-old) incubated with  $^{18}\text{F}$ -JNJ311 (740 kBq / 500  $\mu\text{L}$  / slice) (A and C) in the presence of authentic reference compound JNJ311 (B and D) at 1  $\mu\text{mol/L}$ .

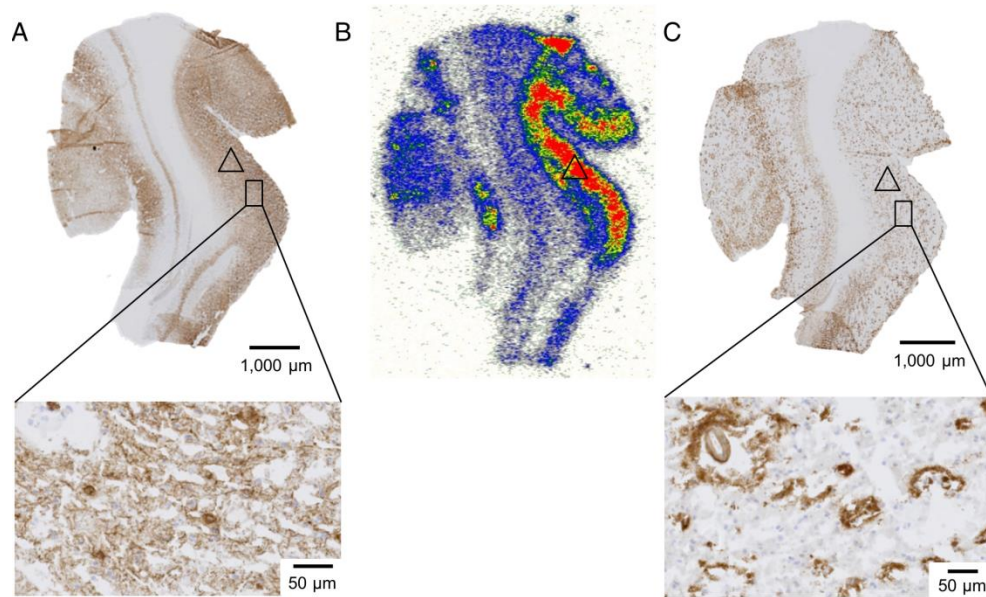

Supplemental Figure 2. Autoradiographic analysis on 10- $\mu\text{m}$ -thick slices of the visual cortex of an AD patient (68-year-old with Braak stage VI) with  $^{18}\text{F}$ -JNJ311 (B). Adjacent slices were immunostained for tau (A, AT8, 1000- $\mu\text{m}$  scale bar) and for  $\beta$ -amyloid (C, 4G8, 1000- $\mu\text{m}$  scale bar). Higher magnification at the bottom identifies tau pathology (50- $\mu\text{m}$  scale bar) and  $\beta$ -amyloid plaques (50- $\mu\text{m}$  scale bar). Triangle indicates area of high density of PHF deposits and relatively low density of  $\beta$ -amyloid deposits.

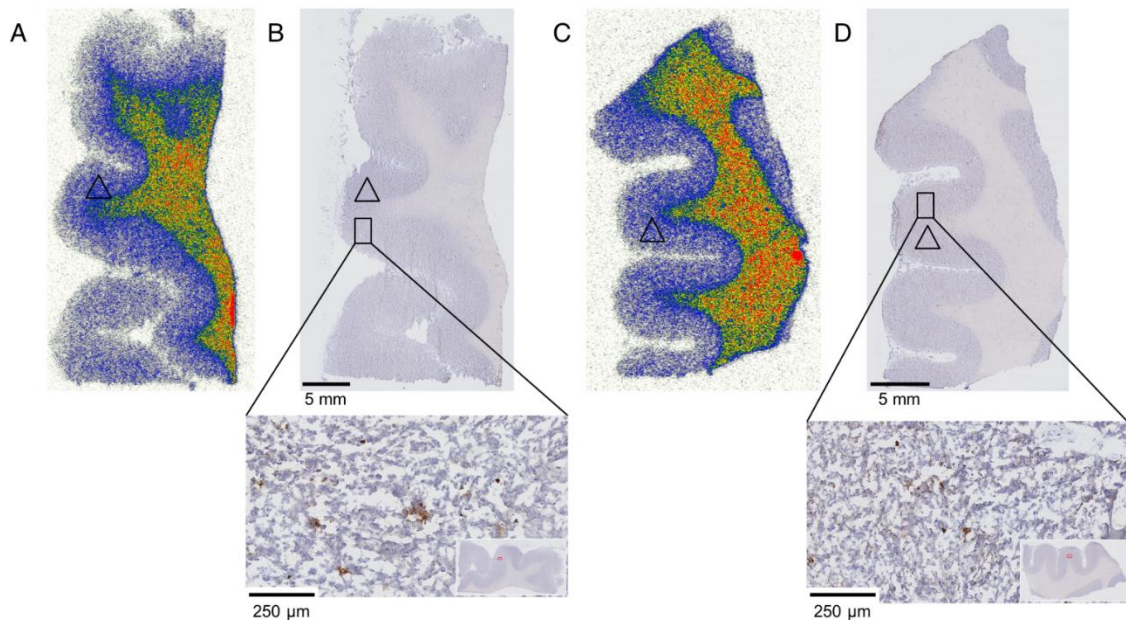

Supplemental Figure 3. Autoradiographic analysis on 10- $\mu$ m-thick slices of the frontal cortex of a PSP patient (71-year-old; A and B) and CBD patient (74-year-old; C and D) with  $^{18}\text{F}$ -JNJ311 (A and C). Adjacent slices were immunostained for tau (B and D, AT8, 5-mm scale bar). Higher magnification at the bottom identifies tau pathology (250- $\mu$ m scale bar). Triangle indicates area of medium density of hyperphosphorylated tau deposits.

Supplemental Table 3. pIC<sub>50</sub>/K<sub>i</sub> (nM) values for purified tau and β-amyloid and molecular features of all compounds.\*

| Compound | pIC <sub>50</sub> – tau | K <sub>i</sub> – tau | pIC <sub>50</sub> - Aβ | K <sub>i</sub> - Aβ | PSA (Å <sup>2</sup> ) <sup>‡</sup> | LogD <sub>7.4</sub> <sup>†</sup> |
|----------|-------------------------|----------------------|------------------------|---------------------|------------------------------------|----------------------------------|
| JNJ311   | 7.7                     | 8                    | < 5                    | > 4398              | 51                                 | 2.2                              |
| AV1451   | 8.4                     | 1                    | 6.2                    | 278                 | 42                                 | 2.2                              |
| AV680    | 7.7                     | 7                    | 5.0                    | 4934                | 33                                 | 3.0                              |
| AV45     | 5.2                     | > 2323               | 7.6                    | 12                  | 53                                 | 3.1                              |

\*pIC<sub>50</sub> values were determined from displacement curves of 2-5 independent experiments, K<sub>i</sub> values were calculated from IC<sub>50</sub> values using the following equation:  $K_i = IC_{50} / (1 + (\text{concentration RL} / K_D \text{ RL}))$ , with a K<sub>D</sub> for PHF of 6.275 nM for <sup>3</sup>H-AV680, a K<sub>D</sub> for β-amyloid of 7.85 nM for <sup>3</sup>H-AV45, and 10 nM of RL concentration in both assays; <sup>†</sup>LogD<sub>7.4</sub> value was chromatographically determined for JNJ311, but calculated for the other compounds; <sup>‡</sup>PSA = polar surface area

Supplemental Table 4. Relative percentages of intact tracer after i.v. injection of  $^{18}\text{F}$ -JNJ311

in plasma of mice and a rhesus monkey and perfused brain of mice.

| MICE           |                                                              |               |               |
|----------------|--------------------------------------------------------------|---------------|---------------|
| Plasma         | Mean % $\pm$ standard deviation ( $n = 3$ ) of intact tracer |               |               |
| <u>2 min</u>   | <u>10 min</u>                                                | <u>30 min</u> | <u>60 min</u> |
| 85 $\pm$ 3     | 33 $\pm$ 6                                                   | 22 $\pm$ 5    | 11 $\pm$ 7    |
| Perfused brain | Mean % $\pm$ standard deviation ( $n = 3$ ) of intact tracer |               |               |
|                | <u>10 min</u>                                                |               | <u>60 min</u> |
|                | 98 $\pm$ 0                                                   |               | 94 $\pm$ 1    |
| MONKEY         |                                                              |               |               |
| Plasma         | % ( $n = 1$ ) of intact tracer                               |               |               |
|                | <u>10 min</u>                                                | <u>30 min</u> | <u>60 min</u> |
|                | 51                                                           | 35            | 28            |

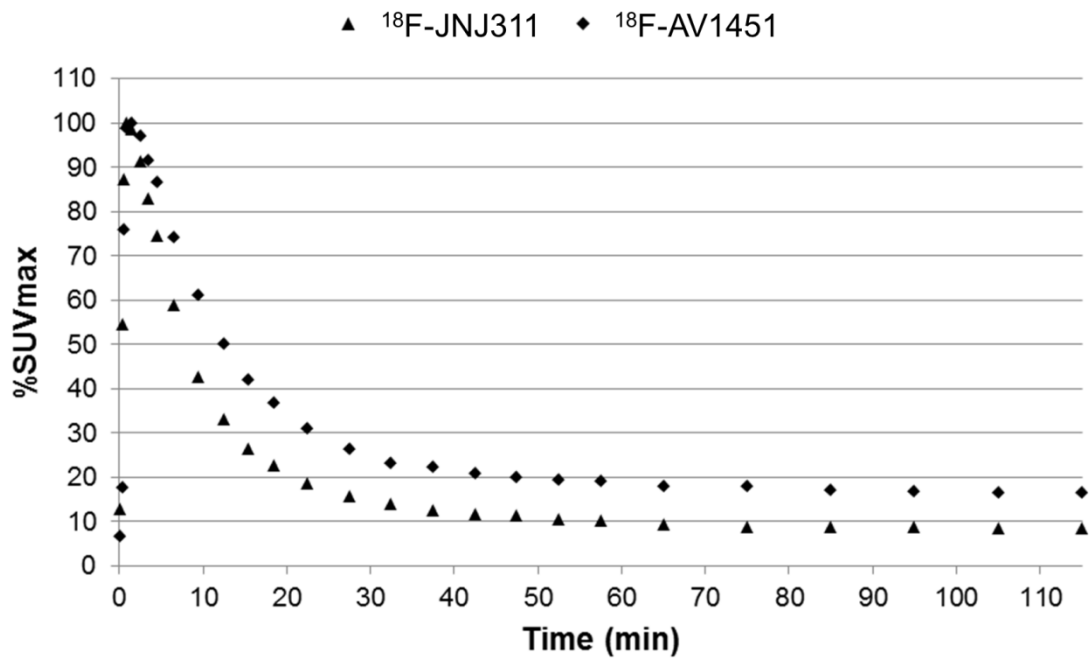

Supplemental Figure 4. %SUV<sub>max</sub> curves of small animal μPET time-activity curves of <sup>18</sup>F-JNJ311 and <sup>18</sup>F-AV1451 in the whole brain of a Wistar rat.



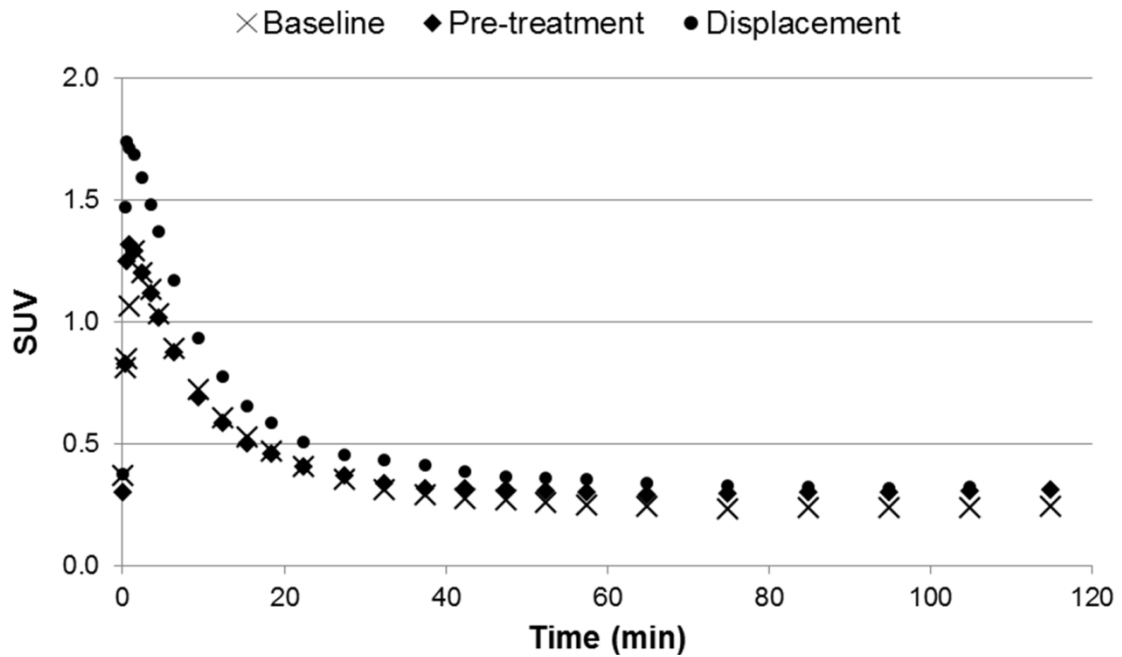

Supplemental Figure 5. Whole brain  $\mu$ PET time-activity curves for  $^{18}\text{F}$ -AV1451 of three female Wistar rats. Baseline scan ( $n = 1$ ); pre-treatment experiment ( $n = 1$ ): pure vehicle, 10 mg/kg injected subcutaneously 60 min prior to radiotracer injection and displacement study ( $n = 1$ ): pure vehicle, 1 mg/kg injected intravenously 30 min after radiotracer injection.

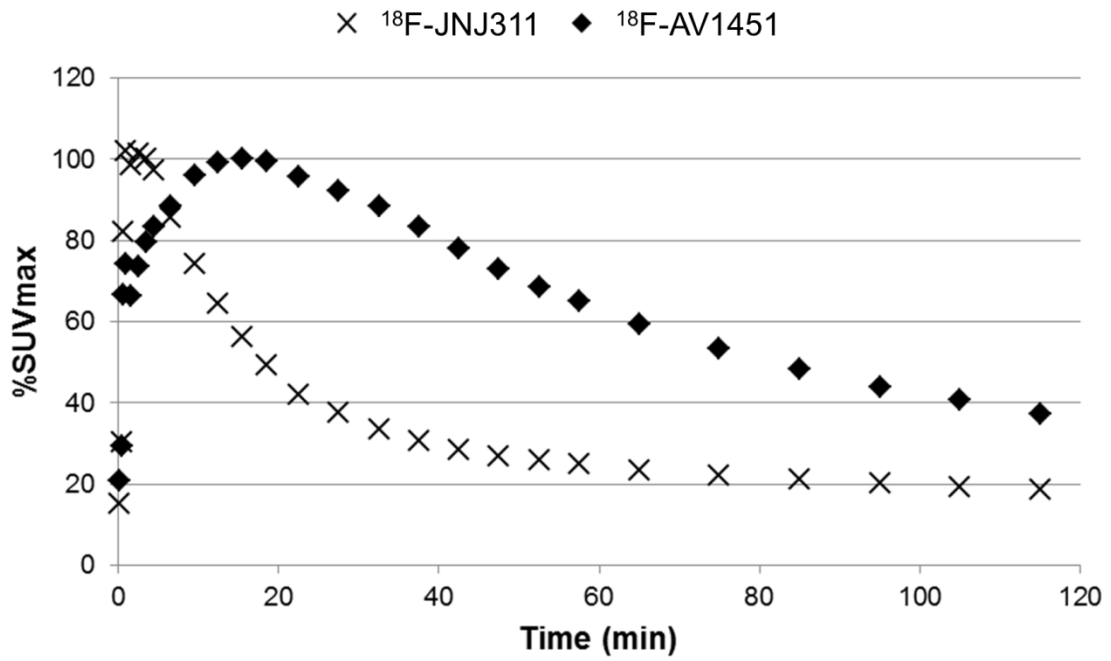

Supplemental Figure 6. Average whole brain %SUV<sub>max</sub> curves of  $^{18}\text{F}$ -JNJ311 and  $^{18}\text{F}$ -AV1451 in a male rhesus monkey.
